# Supplementary material
Source: PubMed Central journal article supplement (PMC5653137)
Supplement: Supp_Fig1.pdf [file Supp_Fig1.pdf]

## Supplementary Data

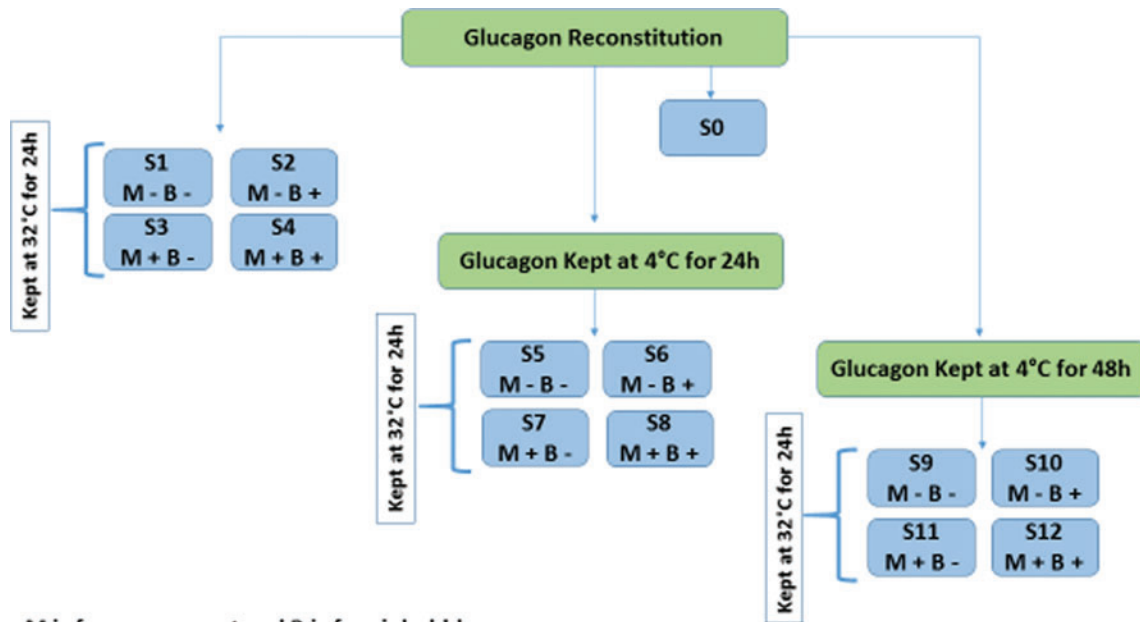

**SUPPLEMENTARY FIG. S1.** Glucagon conditions tested for fibrillation and bioactivity.
