# Supplementary material
Source: PubMed Central journal article supplement (PMC5653137)
Supplement: Supp_Fig2.pdf [file Supp_Fig2.pdf]

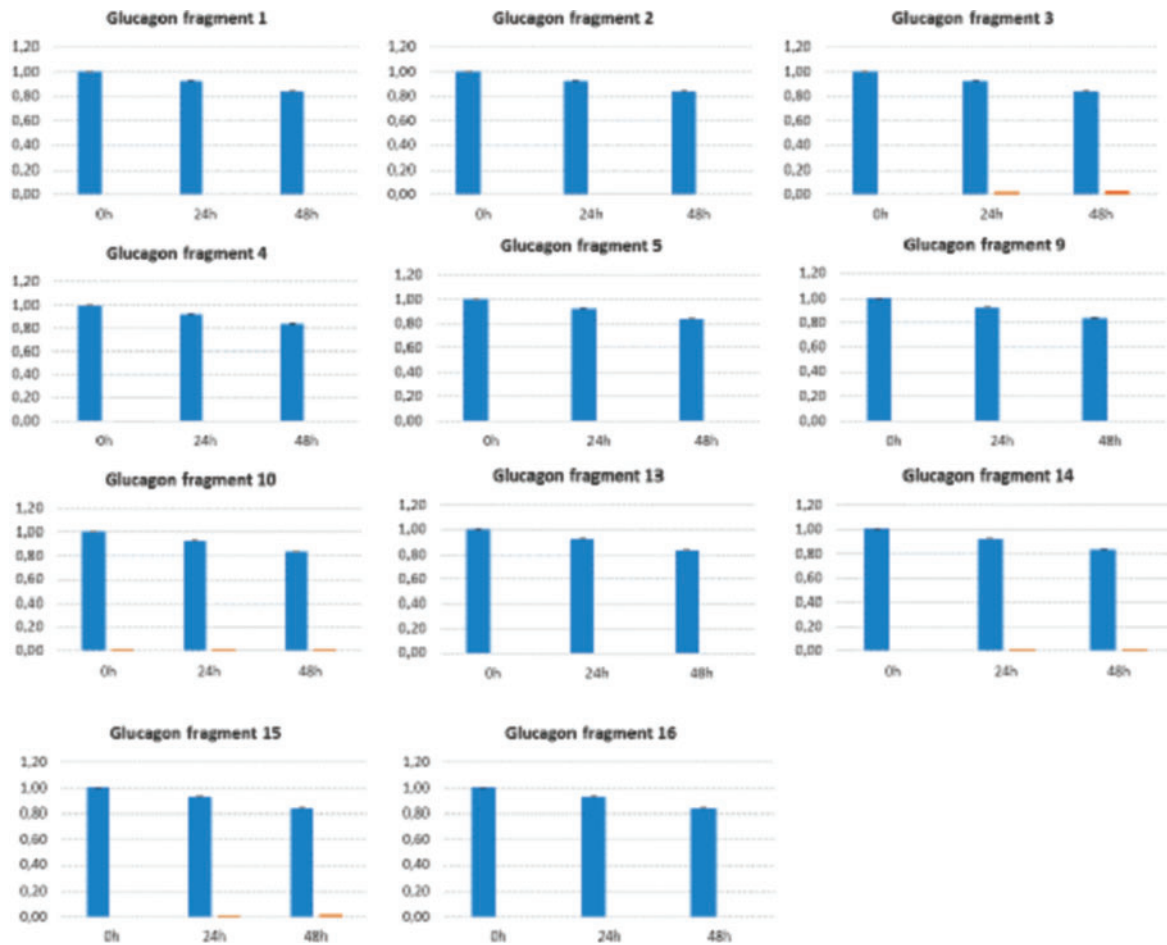

**SUPPLEMENTARY FIG. S2.** Abundance of each detected fragment of glucagon (orange) along the main glucagon molecule (blue),  $n=3$ .
