# Supplementary material
Source: PubMed Central journal article supplement (PMC5653137)
Supplement: Supp_Table3.pdf [file Supp_Table3.pdf]

SUPPLEMENTARY TABLE S3. ACCURACY OF GLUCAGON DELIVERY THROUGH SUBCUTANEOUS INFUSION PUMP SYSTEMS

|                             | <i>Pump used</i> | <i>Expected weight (mg)</i> | <i>Actual weight (mg)</i> | <i>Mean relative difference of actual versus expected weights (%)</i> |
|-----------------------------|------------------|-----------------------------|---------------------------|-----------------------------------------------------------------------|
| <b>Glucagon delivery</b>    |                  |                             |                           |                                                                       |
| 12 boluses of 0.5 units     | Medtronic        | 60                          | 58.621 ± 0.686            | -2.30                                                                 |
| 12 boluses of 0.5 units     | Medtronic        | 60                          | 57.764 ± 0.705            | -3.73                                                                 |
| 12 boluses of 0.5 units     | Accu-Chek        | 60                          | 59.319 ± 0.38             | -1.14                                                                 |
| 12 boluses of 0.5 units     | Accu-Chek        | 60                          | 58.196 ± 0.957            | -3.01                                                                 |
| 10 boluses of 1.0 units     | Medtronic        | 100                         | 100.338 ± 1.223           | +0.34                                                                 |
| 10 boluses of 1.0 units     | Medtronic        | 100                         | 100.895 ± 0.379           | +0.89                                                                 |
| 10 boluses of 1.0 units     | Accu-Chek        | 100                         | 99.946 ± 0.275            | -0.05                                                                 |
| 10 boluses of 1.0 units     | Accu-Chek        | 100                         | 99.684 ± 0.447            | -0.32                                                                 |
| 5 boluses of 3.0 units      | Medtronic        | 150                         | 150.715 ± 1.226           | +0.48                                                                 |
| 5 boluses of 3.0 units      | Medtronic        | 150                         | 149.32 ± 3.624            | -0.45                                                                 |
| 5 boluses of 3.0 units      | Accu-Chek        | 150                         | 149.299 ± 0.436           | -0.47                                                                 |
| 5 boluses of 3.0 units      | Accu-Chek        | 150                         | 149.73 ± 2.022            | -0.18                                                                 |
| 6.0 units infusion over 4 h | Medtronic        | 60                          | 60.183 ± 1.235            | +2.76                                                                 |
| 6.0 units infusion over 4 h | Accu-Chek        | 60                          | 60.507 ± 0.406            | -1.41                                                                 |
| <b>Insulin delivery</b>     |                  |                             |                           |                                                                       |
| 12 boluses of 0.5 units     | Medtronic        | 60                          | 60.710 ± 0.741            | +1.18                                                                 |
| 12 boluses of 0.5 units     | Medtronic        | 60                          | 59.036 ± 0.248            | -1.61                                                                 |
| 12 boluses of 0.5 units     | Accu-Chek        | 60                          | 59.256 ± 1.088            | -1.24                                                                 |
| 12 boluses of 0.5 units     | Accu-Chek        | 60                          | 59.130 ± 1.321            | -1.45                                                                 |
| 10 boluses of 1.0 units     | Medtronic        | 100                         | 98.635 ± 0.492            | -1.36                                                                 |
| 10 boluses of 1.0 units     | Medtronic        | 100                         | 98.839 ± 0.469            | -1.61                                                                 |
| 10 boluses of 1.0 units     | Accu-Chek        | 100                         | 97.929 ± 0.136            | -2.07                                                                 |
| 10 boluses of 1.0 units     | Accu-Chek        | 100                         | 98.37 ± 0.281             | -1.63                                                                 |
| 5 boluses of 3.0 units      | Medtronic        | 150                         | 148.61 ± 0.425            | -0.93                                                                 |
| 5 boluses of 3.0 units      | Medtronic        | 150                         | 149.113 ± 0.23            | -0.59                                                                 |
| 5 boluses of 3.0 units      | Accu-Chek        | 150                         | 148.797 ± 0.617           | -0.80                                                                 |
| 5 boluses of 3.0 units      | Accu-Chek        | 150                         | 149.169 ± 0.345           | -0.55                                                                 |
| 6.0 units infusion over 4 h | Medtronic        | 60                          | 60.183 ± 1.235            | +0.30                                                                 |
| 6.0 units infusion over 4 h | Accu-Chek        | 60                          | 60.507 ± 0.406            | +0.85                                                                 |
