# Supplementary material
Source: PubMed Central journal article supplement (PMC5653137)

SUPPLEMENTARY FIG. S3. Bioactivity glucagon testing, EC<sub>50</sub> comparisons, *n* = 4.

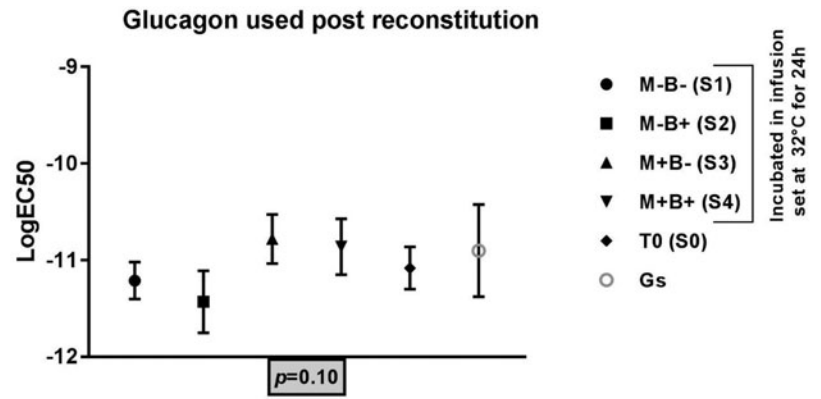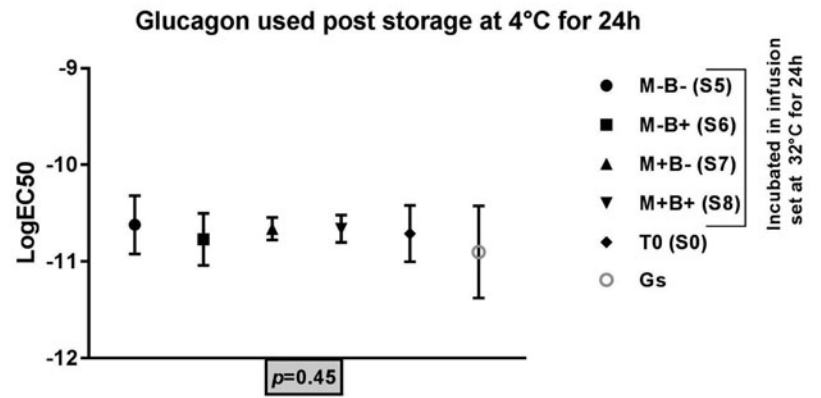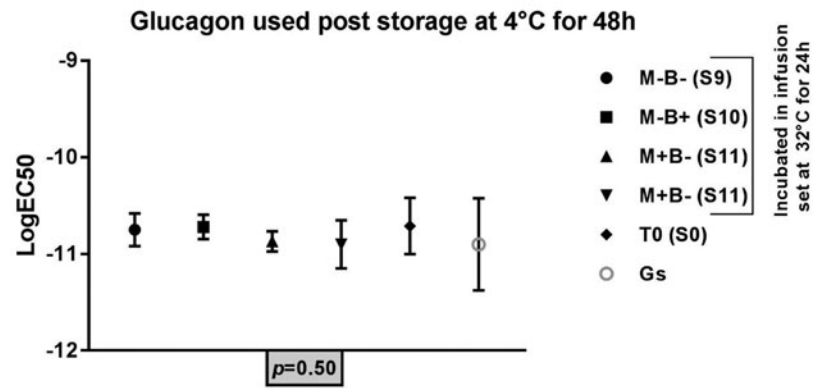

Supplement: Supp_Fig3.pdf [file Supp_Fig3.pdf]
